# Supplementary material
Source: publisher site journal article supplement (https://www.dovepress.com/article/563533)

**Table S1 ICC for the parameters measured by two radiologists**

| Variables | | ICC (95% CI) | F | P |
| --- | --- | --- | --- | --- |
| Intratumor parameters | WIS-L | 0.883 (0.823-0.923) | 45.327 | <0.001** |
| WOS-L | 0.854 (0.792-0.901) | 38.612 | <0.001** |
| Peritumor parameters | WIS-P | 0.921 (0.884-0.949) | 62.105 | <0.001** |
| WOS-P | 0.812 (0.762-0.858) | 28.934 | <0.001** |
| Kinetic parameters | Peak PE | 0.894 (0.843-0.932) | 50.746 | <0.001** |
| Peak SER | 0.941 (0.903-0.965) | 75.432 | <0.001** |
| DWI metrics | ADC | 0.833 (0.773-0.882) | 34.215 | <0.001** |

Note: **P<0.001. intraclass correlation coefficient ICC. A random subset of 30% of the study cohort (n=47/159) underwent duplicate assessments by two radiologists. All ICC >0.75 demonstrating the reproducibility of included parameters in this study.

**Table S2 Final logistic regression coefficients for the IPIO index**

| Feature | Coefficient(β) | Standard error | Wald χ2 | P value | Odds Ratio (95% CI) |
| --- | --- | --- | --- | --- | --- |
| Intercept | -2.45 | 0.68 | 12.98 | <0.001 | - |
| PE | 1.32 | 0.42 | 9.88 | 0.002 | 3.74 (1.64-8.53) |
| SER | 0.87 | 0.35 | 6.18 | 0.013 | 2.39 (1.20-4.75) |
| WIS-P | 0.94 | 0.38 | 6.12 | 0.013 | 2.56 (1.22–5.38) |
| WOS-L | 0.76 | 0.31 | 6.01 | 0.014 | 2.14 (1.17–3.92) |
| WOS-P | 0.58 | 0.29 | 4.00 | 0.046 | 1.79 (1.01–3.17) |

Note: One candidate feature (WIO-I) was excluded from the final model due to collinearity (variance inflation factor > 5), indicating redundancy with other retained parameters.

**Figure S1 Ten‑fold cross‑validation. (left) Training cohort; (right) Independent validation cohort.**


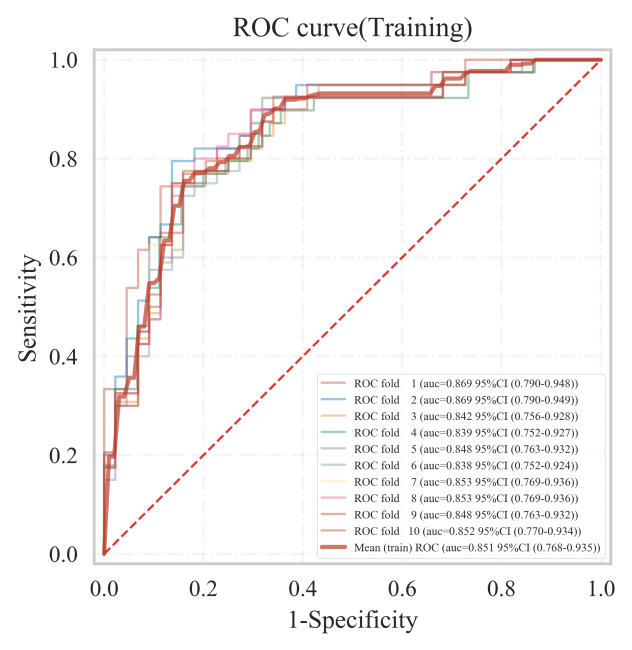

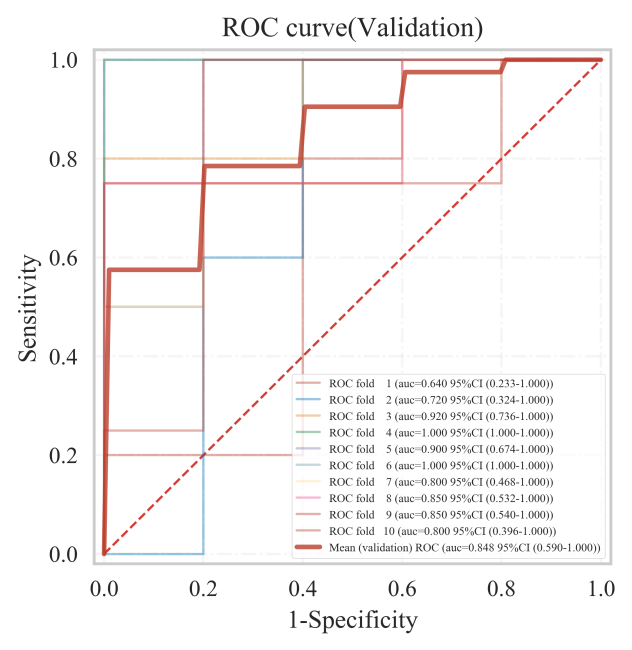


**Figure S2 Calibration curves for the IPIO model.**


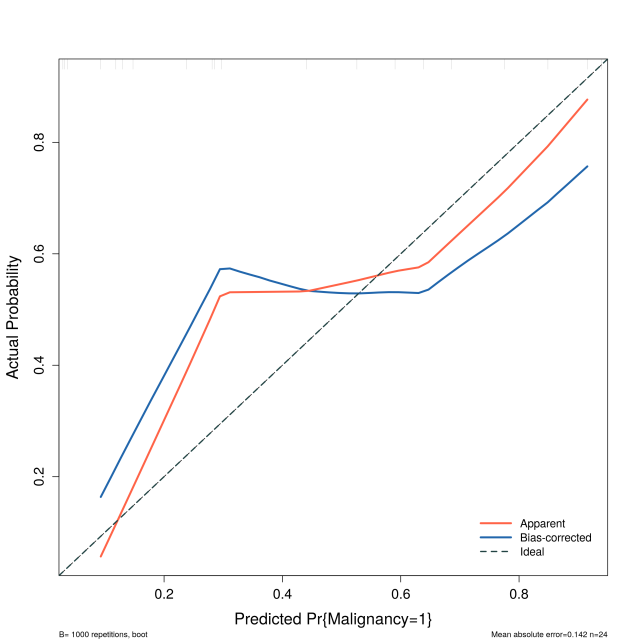


Note: The diagonal dashed line represents perfect calibration

**Figure S3 Decision curve analysis for the IPIO model**


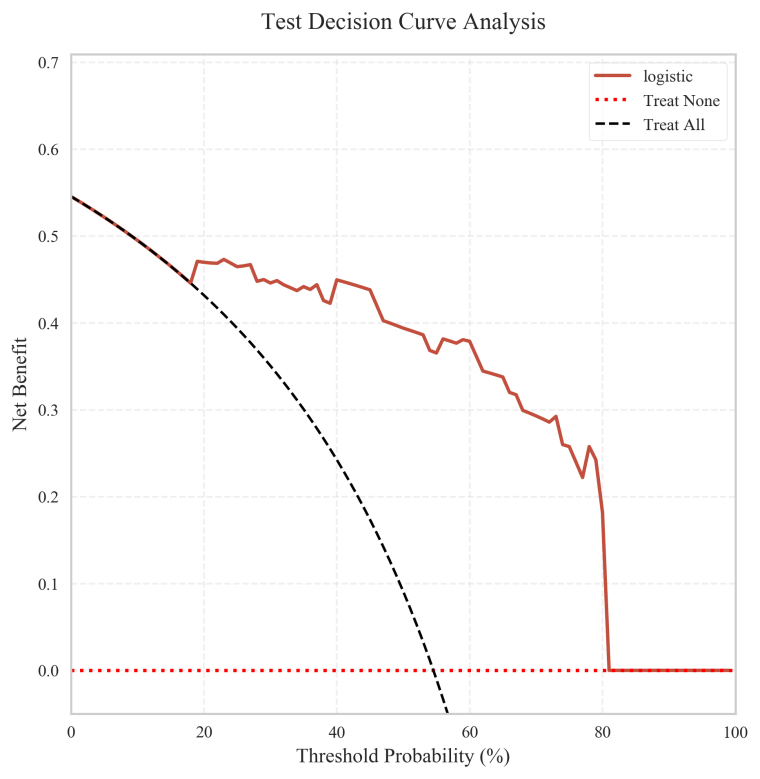

Supplement: Supplementary file 1 [file 563533%20Supplementary%20Material.docx]
